# Supplementary material for: Biomimetic layer-by-layer deposition assisted synthesis of Cu, N co-doped TiO2nanosheets with enhanced visible light photocatalytic performance
Source: Royal Society of Chemistry journal article supplement (doi:10.1039/c4dt01605j), 2014-07-29
Supplement: c4dt01605j1.pdf [file c4dt01605j1.pdf]

*Electronic Supplementary Information For*

Biomimetic layer-by-layer deposition assisted synthesis of Cu, N co-doped TiO<sub>2</sub> nanosheets with enhanced visible light photocatalytic performance

*Xiaobo Wang, Yong Yan, Bo Hao and Ge Chen\**

College of Environmental & Energy Engineering, Beijing University of Technology, Pingleyuan  
100, 100124, Beijing, P.R. China.

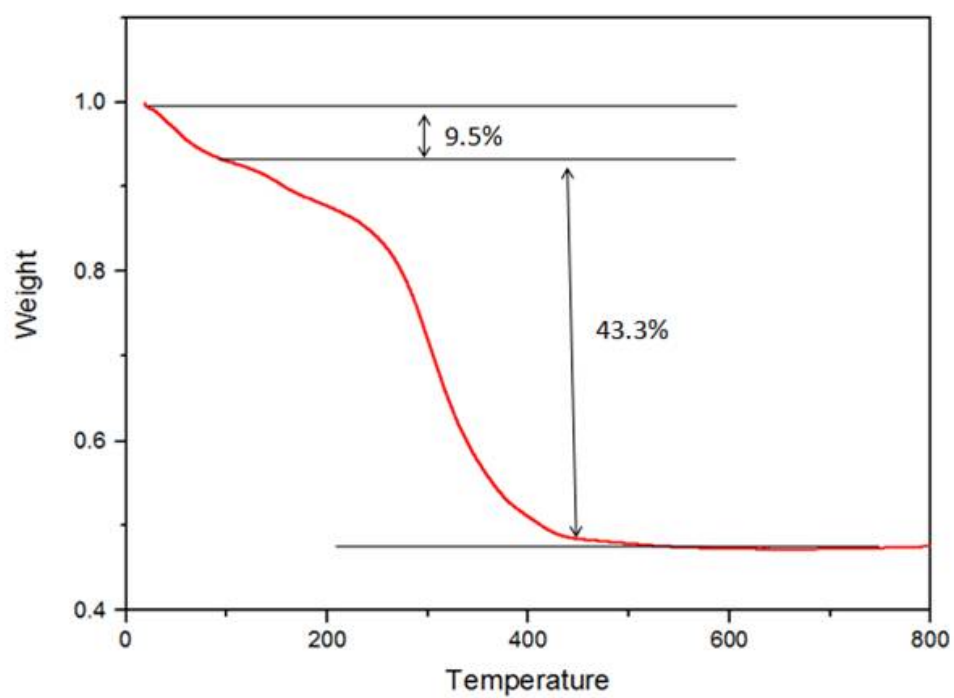

**Figure S1.** Thermogravimetric analysis of the b-PEI/Cu-Ti-O-coated graphene oxides upon heating at  $5^{\circ}\text{C min}^{-1}$  to  $800^{\circ}\text{C}$  in air.

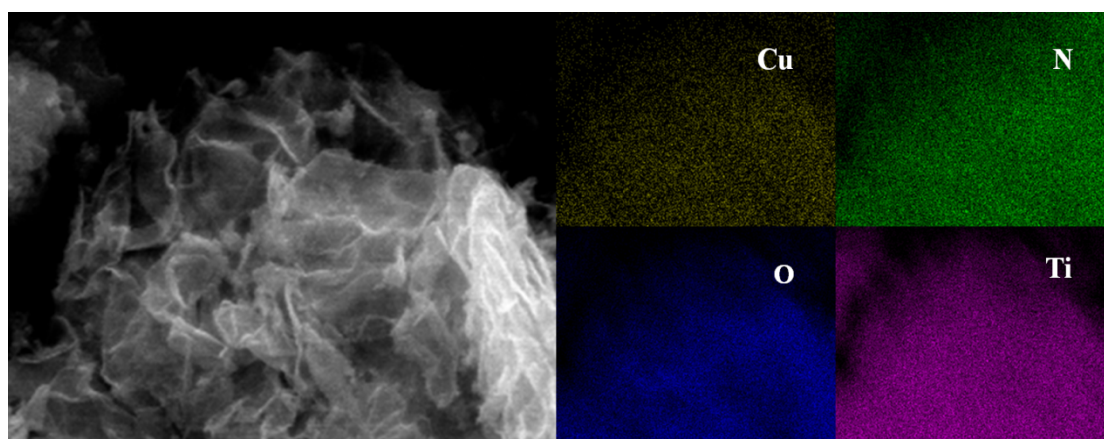

**Figure S2.** The EDX mapping results of Cu, N, O and Ti species in TiO<sub>2</sub> nanosheets.

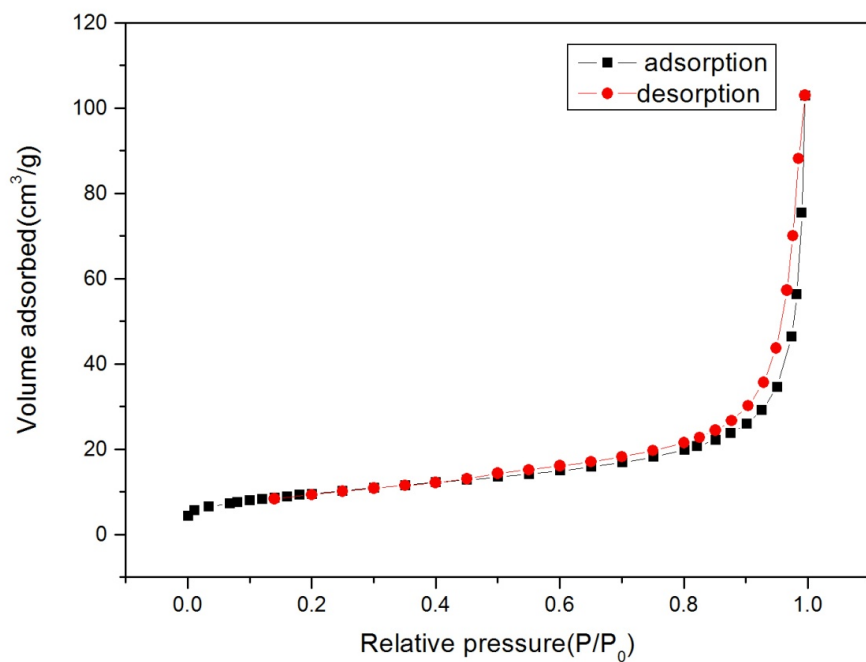

**Figure S3.** The nitrogen adsorption/desorption isotherms of Cu, N co-doped TiO<sub>2</sub> nanosheet measurement conducted at 77 K.

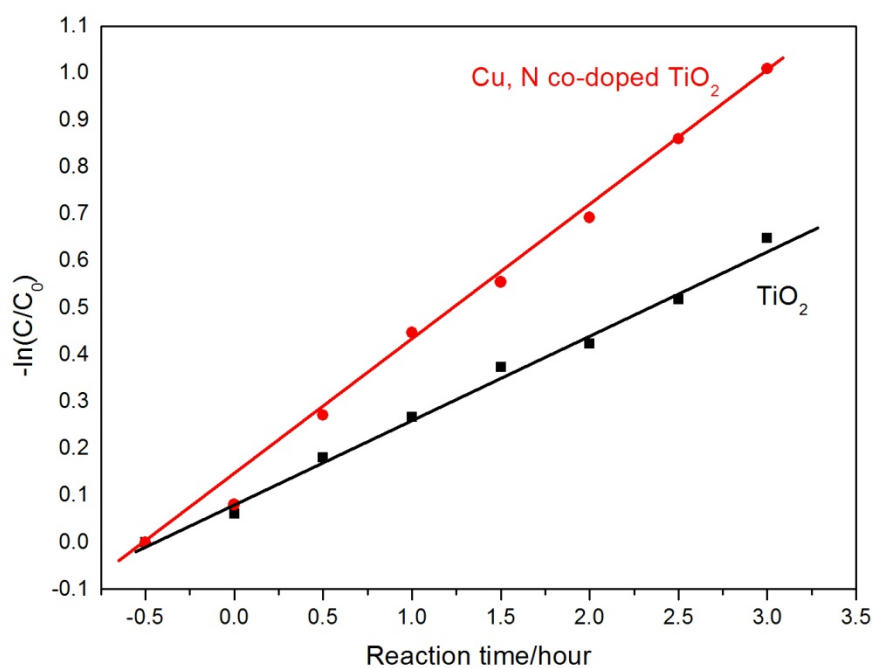

**Figure S4.** Kinetic study of the photocatalytic degradation of MB.

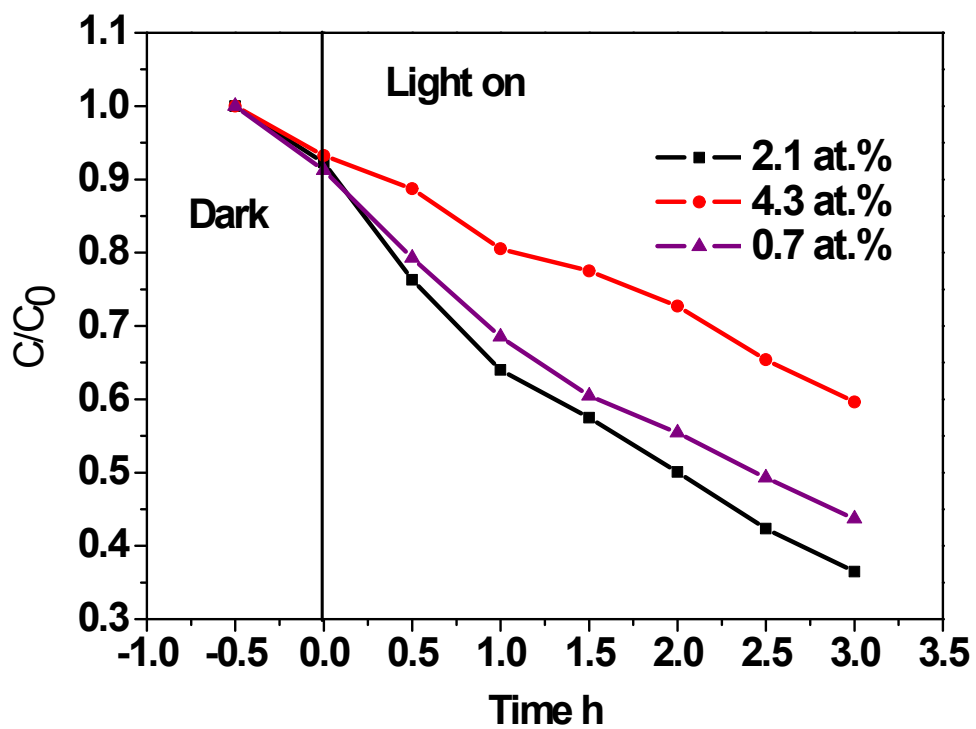

**Figure S5.** Photocatalytic degradation of MB for samples with different Cu content under visible light.
